# Supplementary material for: A Combination of Ruthenium Complexes and Photosensitizers to Treat Colorectal Cancer
Source: Preprints.org preprint supplement (doi:10.20944/preprints202309.1909.v1), 2023-09-28
Supplement: Supplementary file 1 [file supplementary]

Article

A Combination of Ruthenium Complexes and Photosensitizers to Treat Colorectal Cancer

Jacquie Massoud 1, Aline Pinon 1, Manuel Gallardo-Villagrán 1,2, Lucie Paulus 1, Catherine Ouk 3, Claire Carrion 3, Sayed Antoun 4, Mona Diab-Assaf 5, Bruno Therrien 2,* and Bertrand Liagre 1,*

| **Citation:** To be added by editorial staff during production.  Academic Editor: Firstname Lastname  Received: date  Revised: date  Accepted: date  Published: date  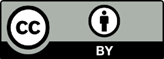  **Copyright:** © 2023 by the authors. Submitted for possible open access publication under the terms and conditions of the Creative Commons Attribution (CC BY) license (https://creativecommons.org/licenses/by/4.0/). |
| --- |

**Supporting information**


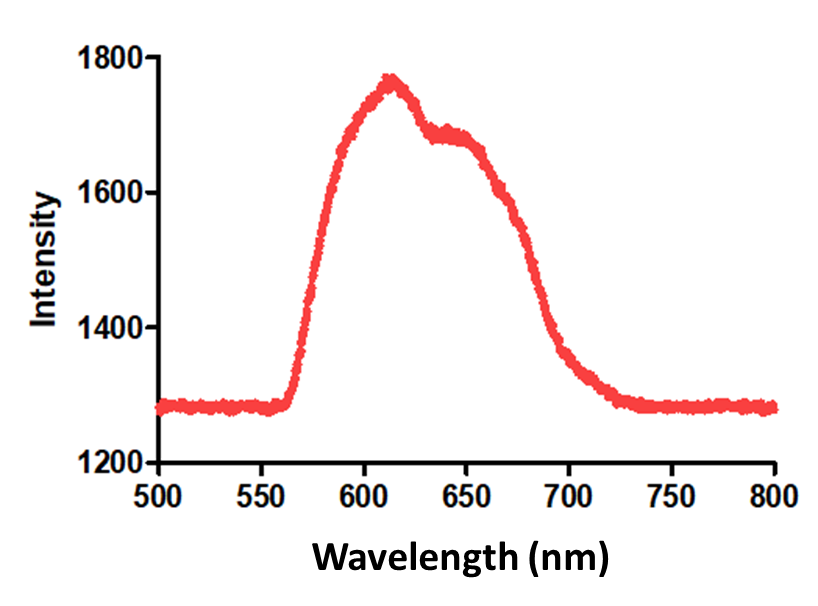


**Figure S1.** Emission spectrum of the used light source (a 630-660 nm CURElight lamp (PhotoCure ASA, Oslo, Norway)).
